# Supplementary material
Source: publisher figshare collection journal article supplement (https://tandf.figshare.com/ndownloader/files/22914617)
Supplement: Supplementary file 1 [file 22914617]

**Appendix**

Table A1. Correlation matrix – Distracted Pedestrians

|  | **Age 0-17 (child)** | **Age 18-34 (young)** | | **Age 35-64 (middle)** | | **Age 65 or older (old)** | | **Accompanied** | | **Crossing Length** |
| --- | --- | --- | --- | --- | --- | --- | --- | --- | --- | --- |
| **Age 0-17 (child)** | 1.000 | -0.286 | | -0.138 | | -0.059 | | -0.081 | | -0.072 |
| **Age 18-34 (young)** | -0.286 | 1.000 | | -0.760 | | -0.327 | | -0.082 | | 0.180 |
| **Age 35-64 (middle)** | -0.138 | -0.760 | | 1.000 | | -0.157 | | 0.137 | | -0.093 |
| **Age 65 or older (old)** | -0.059 | -0.327 | | -0.157 | | 1.000 | | -0.001 | | -0.165 |
| **Accompanied** | -0.081 | -0.082 | | 0.137 | | -0.001 | | 1.000 | | -0.232 |
| **Crossing Length** | -0.072 | 0.180 | | -0.093 | | -0.165 | | -0.232 | | 1.000 |
| **(Pedestrian Volume)2** | -0.014 | -0.105 | | 0.054 | | 0.135 | | 0.271 | | -0.496 |
| **Traffic Light** | -0.011 | 0.262 | | -0.104 | | -0.335 | | 0.002 | | 0.196 |
| **Pedestrian Volume** | -0.008 | -0.120 | | 0.051 | | 0.165 | | 0.244 | | -0.502 |
| **Log(Speed)** | -0.040 | 0.202 | | -0.117 | | -0.151 | | -0.286 | | 0.475 |
|  | **(Pedestrian Volume)2** | | **Traffic Light** | | **Pedestrian Volume** | | **Log(Speed)** | |
| **Age 0-17 (child)** | -0.014 | | -0.011 | | -0.008 | | -0.040 | |
| **Age 18-34 (young)** | -0.105 | | 0.262 | | -0.120 | | 0.202 | |
| **Age 35-64 (middle)** | 0.054 | | -0.104 | | 0.051 | | -0.117 | |
| **Age 65 or older (old)** | 0.135 | | -0.335 | | 0.165 | | -0.151 | |
| **Accompanied** | 0.271 | | 0.002 | | 0.244 | | -0.286 | |
| **Crossing Length** | -0.496 | | 0.196 | | -0.502 | | 0.475 | |
| **(Pedestrian Volume)2** | 1.000 | | -0.103 | | 0.959 | | -0.391 | |
| **Traffic Light** | -0.103 | | 1.000 | | -0.084 | | 0.113 | |
| **Pedestrian Volume** | 0.959 | | -0.084 | | 1.000 | | -0.411 | |
| **Log(Speed)** | -0.391 | | 0.113 | | -0.411 | | 1.000 | |

Table A2. Correlation matrix – Non-Distracted Pedestrians

|  | **Age 0-17 (child)** | **Age 18-34 (young)** | | **Age 35-64 (middle)** | | **Age 65 or older (old)** | | **Accompanied** | | **Crossing Length** |
| --- | --- | --- | --- | --- | --- | --- | --- | --- | --- | --- |
| **Age 0-17 (child)** | 1.000 | -0.197 | | -0.190 | | -0.129 | | 0.171 | | -0.014 |
| **Age 18-34 (young)** | -0.197 | 1.000 | | -0.581 | | -0.393 | | 0.038 | | 0.029 |
| **Age 35-64 (middle)** | -0.190 | -0.581 | | 1.000 | | -0.379 | | -0.099 | | 0.011 |
| **Age 65 or older (old)** | -0.129 | -0.393 | | -0.379 | | 1.000 | | -0.030 | | -0.040 |
| **Accompanied** | 0.171 | 0.038 | | -0.099 | | -0.030 | | 1.000 | | -0.118 |
| **Crossing Length** | -0.014 | 0.029 | | 0.011 | | -0.040 | | -0.118 | | 1.000 |
| **(Pedestrian Volume)2** | 0.040 | -0.006 | | -0.043 | | 0.035 | | 0.128 | | -0.559 |
| **Traffic Light** | 0.095 | -0.036 | | -0.014 | | 0.003 | | 0.122 | | 0.059 |
| **Pedestrian Volume** | 0.048 | -0.021 | | -0.027 | | 0.029 | | 0.152 | | -0.605 |
| **Log(Speed)** | -0.018 | 0.206 | | 0.000 | | -0.237 | | -0.278 | | 0.445 |
|  | **(Pedestrian Volume)2** | | **Traffic Light** | | **Pedestrian Volume** | | **Log(Speed)** | |
| **Age 0-17 (child)** | 0.040 | | 0.095 | | 0.048 | | -0.018 | |
| **Age 18-34 (young)** | -0.006 | | -0.036 | | -0.021 | | 0.206 | |
| **Age 35-64 (middle)** | -0.043 | | -0.014 | | -0.027 | | 0.000 | |
| **Age 65 or older (old)** | 0.035 | | 0.003 | | 0.029 | | -0.237 | |
| **Accompanied** | 0.128 | | 0.122 | | 0.152 | | -0.278 | |
| **Crossing Length** | -0.559 | | 0.059 | | -0.605 | | 0.445 | |
| **(Pedestrian Volume)2** | 1.000 | | -0.059 | | 0.970 | | -0.349 | |
| **Traffic Light** | -0.059 | | 1.000 | | -0.048 | | -0.159 | |
| **Pedestrian Volume** | 0.970 | | -0.048 | | 1.000 | | -0.389 | |
| **Log(Speed)** | -0.349 | | -0.159 | | -0.389 | | 1.000 | |
